# Supplementary material
Source: PubMed Central journal article supplement (PMC4915639)
Supplement: 10.3163.1536-5050.104.3.006.sg001.pdf [file 10.3163.1536-5050.104.3.006.sg001.pdf]

## **How do early career health sciences information professionals gain competencies?**

*Bethany A. Myers, MSLIS; Bredny Rodriguez, MLS*

### **APPENDIX A**

#### **Email invitation**

We are conducting a study to investigate the various ways in which early career health information professionals attain and develop career competencies set forth by the Medical Library Association (MLA).

Your participation in this survey is voluntary and anonymous. The survey will take an estimated fifteen minutes to complete and will be open through [date]. Results will be presented as a poster at the 2015 MLA annual meeting.

The survey is located at: [URL]

We appreciate your time and participation! Questions should be directed to:

Bethany Myers  
Research Informationist, UCLA Biomedical Library  
[bethanymyers@library.ucla.edu](mailto:bethanymyers@library.ucla.edu)

Bredny Rodriguez  
Health and Life Sciences Informationist, UCLA Biomedical Library  
[brednyr@library.ucla.edu](mailto:brednyr@library.ucla.edu)
